# Supplementary material
Source: HighWire-hosted journal article supplement (https://jpet.aspetjournals.org/content/suppl/2020/02/06/jpet.119.262907)

**Journal title: Journal of Pharmacology and Experimental Therapeutics**

**Article's title: Cinnamaldehyde inhibits inflammation of human synoviocyte cells through regulation of Jak/Stat pathway and ameliorates collagen-induced arthritis in rats**

Wen-Xiang Cheng<sup>1,2,#</sup>, Shan Zhong<sup>1,4,#</sup>, Xiang-Bo Meng<sup>1</sup>, Nian-Ye Zheng<sup>3</sup>, Peng

Zhang<sup>1,2</sup>, Yun Wang<sup>4</sup>, Ling Qin<sup>1,3</sup>, Xin-Luan Wang<sup>1,2,3,\*</sup>

1. Translational Medicine R&D Center, Institute of Biomedical and Health Engineering, Shenzhen Institutes of Advanced Technology, Chinese Academy of Sciences, Shenzhen, China.
2. University of Chinese Academy of Sciences, Beijing, China.
3. Musculoskeletal Research Laboratory of Department of Orthopaedics & Traumatology and Innovative Orthopaedic Biomaterial and Drug Translational Research Laboratory of Li Ka Shing Institute of Health, The Chinese University of Hong Kong, Hong Kong SAR, China.
4. Center for Research and Technology of Precision Medicine, College of Life Sciences and Oceanography, Shenzhen University, Shenzhen, Guangdong, China.

# Wen-Xiang Cheng and Shan Zhong contributed equally to this paper.

\* Corresponding authors

## **Supplemental Figure legends:**

### **Supplemental Figure 1**

Anti-inflammation effects of Cin detection in primary synovial cells by enzyme linked immunosorbent assay (ELISA). Elisa results demonstrated that Cin inhibited the production of IL-6 and IL-8 with dose-dependently in IL-1 $\beta$  stimulated primary synovial cells. \* $P$ <0.05, \*\* $P$ <0.001 compared to Control group (Ctrl, IL-1 $\beta$  treated alone).

### **Supplemental Figure 2**

Panoramic image of histological findings, H&E staining (40x).

## Supplemental Figure 1

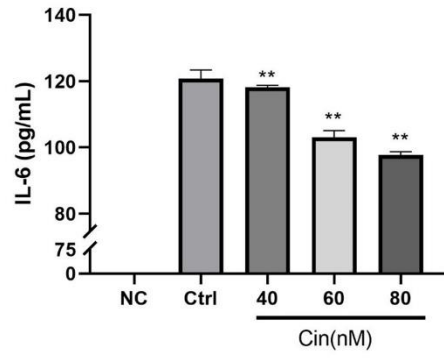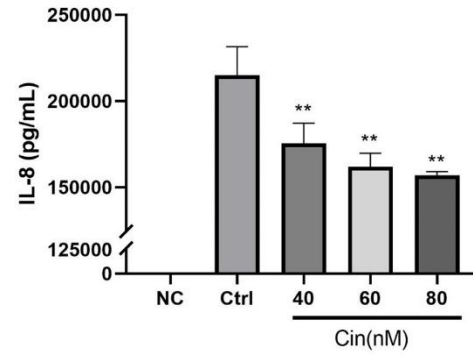

## Supplemental Figure 2

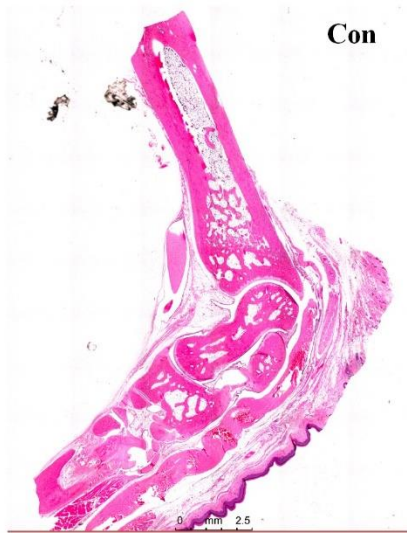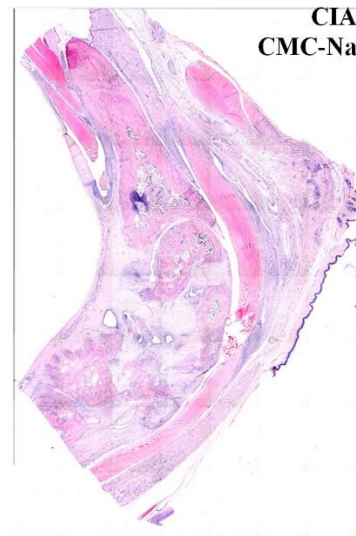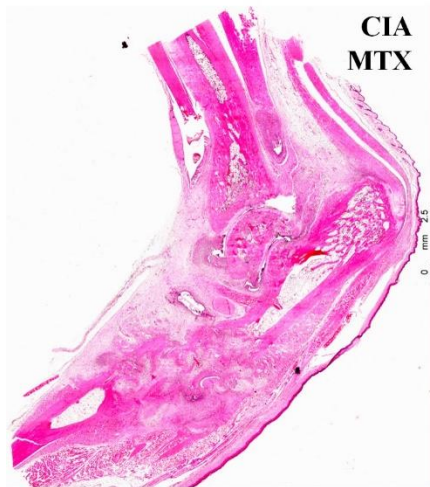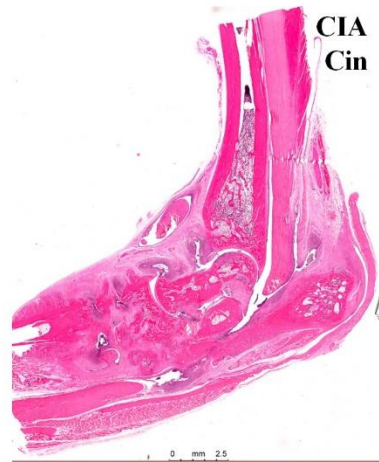

Supplement: 262907SupplFigures.pdf [file 262907SupplFigures.pdf]
